# Supplementary material for: A Colorimetric Assay for the Detection of Glucose and H2O2 Based on Cu-Ag/g-C3N4/ZIF Hybrids with Superior Peroxidase Mimetic Activity
Source: MDPI journal article supplement (doi:10.3390/molecules25194432), 2020-09-27
Supplement: s1 [file s1]

# Supporting Information

## A Colorimetric Assay for the Detection of Glucose and H<sub>2</sub>O<sub>2</sub> Based on Cu-Ag/g-C<sub>3</sub>N<sub>4</sub>/ZIF Hybrids with Superior Peroxidase Mimetic Activity

Quan Pan <sup>1,†</sup>, Yuelin Kong <sup>2,†</sup>, Kuan Chen <sup>2</sup>, Mi Mao <sup>2</sup>, Xiaohui Wan <sup>1</sup>, Xiaoyan She <sup>1</sup>, Qingsong Gao <sup>1</sup>, Yu He <sup>2,\*</sup> and Gongwu Song <sup>2</sup>

<sup>1</sup> Hubei Province Fiber Inspection Bureau, Wuhan 430061, China; panquanfq@163.com (Q.P.); yangguangwxh9272@163.com (X.W.); sxy13871171608@163.com (X.S.); gqs0601@163.com (Q.G.)

<sup>2</sup> Hubei Collaborative Innovation Center for Advanced Organic Chemical Materials, Ministry-of-Education Key Laboratory for the Synthesis and Application of Organic Functional Molecules, College of Chemistry and Chemical Engineering, Hubei University, Wuhan 430062, China; kongyue\_lin@163.com (Y.K.); workout\_k@163.com (K.C.); xxhh\_my@163.com (M.M.); songgw@hubu.edu.cn (G.S.) heyu@hubu.edu.cn (Y.H)

\* Correspondence: [heyu@hubu.edu.cn](mailto:heyu@hubu.edu.cn)

† These authors contributed equally to this work.

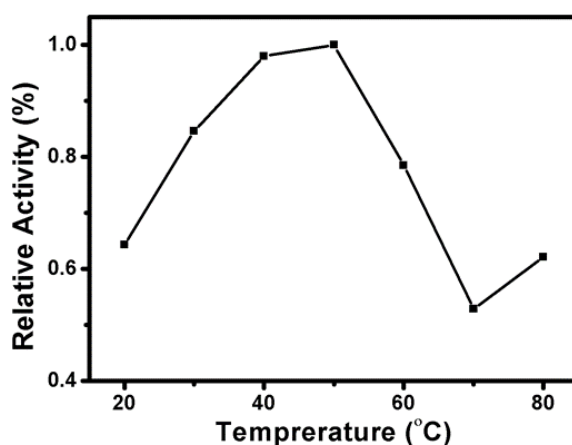

Figure 1. Effects of different temperatures on catalytic activity of Cu-Ag/g-C<sub>3</sub>N<sub>4</sub>/ZIF.

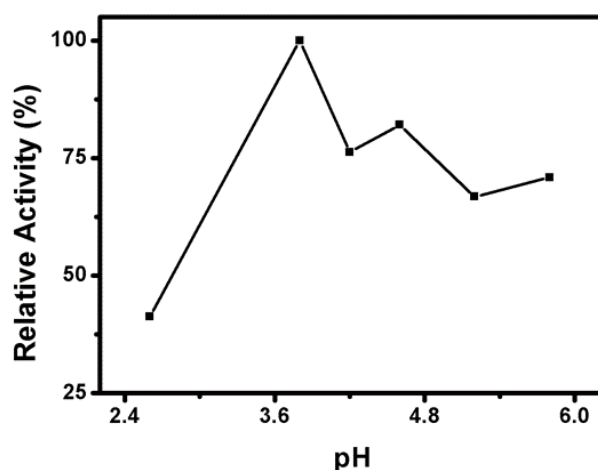

Figure 2. Effects of different pH on catalytic activity of Cu-Ag/g-C<sub>3</sub>N<sub>4</sub>/ZIF.

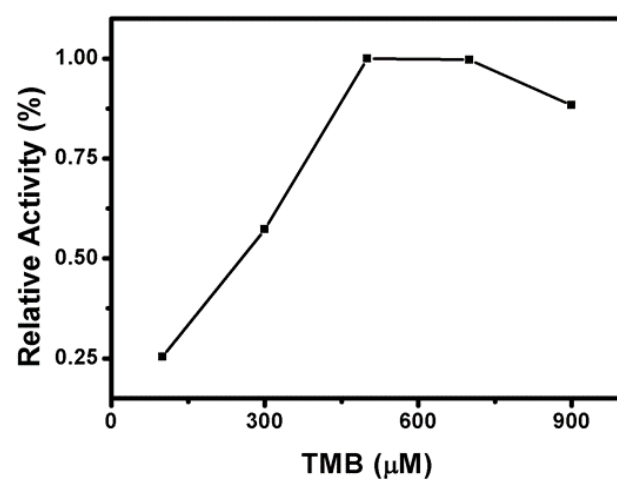

**Figure 3.** Effects of different concentration of TMB on catalytic activity of Cu-Ag/g- $\text{C}_3\text{N}_4$ /ZIF.
